# Supplementary material
Source: MDPI journal article supplement (https://www.mdpi.com/2072-4292/9/10/1028)
Supplement: s1 [file s1]

# Supplementary material for “Did anthropogenic Activities Trigger the 3 April 2017 $M_w$ 6.5 Botswana Earthquake?”

Matteo Albano <sup>1, \*</sup>, Marco Polcari <sup>1</sup>, Christian Bignami <sup>1</sup>, Marco Moro <sup>1</sup>, Michele Saroli <sup>2,1</sup>, Salvatore Stramondo <sup>1</sup>

**Table S1.** Fault parameters from the CMT solution and the inversion of teleseismic body waves (<http://geoscope.ipgp.fr/index.php/en/catalog/earthquake-description?seis=us10008e3k>) [3] and InSAR data [4].

| Solutions                                                                  |                | Length<br>(km) | Width<br>(km) | Depth<br>(km) | Dip<br>(°) | Strike (°) | Rake<br>(°) | Slip<br>(m) |
|----------------------------------------------------------------------------|----------------|----------------|---------------|---------------|------------|------------|-------------|-------------|
| CMT<br>( <a href="http://www.globalcmt.org">http://www.globalcmt.org</a> ) | Plane 1        | 26             | 12            | 25            | 41         | 332        | -70         | 0.51        |
|                                                                            | Plane 2        | 26             | 12            | 24            | 51         | 126        | -107        | 0.51        |
| Teleseismic body waves [3]                                                 | Plane 1        | -              | -             | 30            | 35         | 333        | -74         | -           |
|                                                                            | Plane 2        | -              | -             | 30            | 57         | 133        | -101        | -           |
| Kolawole et al. [4]                                                        | Best fit plane | -              | -             | 21-24         | 53         | 306        | -114        | 1.8         |

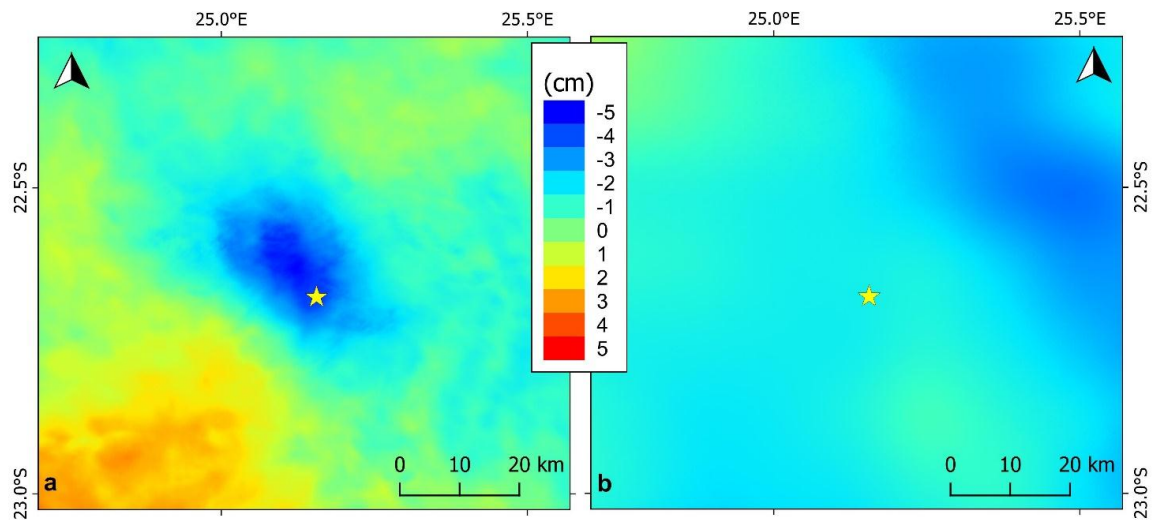

**Figure S1.** (a) Detail of the area bordered by the dashed black square in Figure 2a, showing the unwrapped interferogram; (b) Estimated Zenith Path Delay Difference Map (<http://ceg-research.ncl.ac.uk/v2/gacos/>) [22], projected along the satellite LoS. The area and the colormap are the same of panel (a).

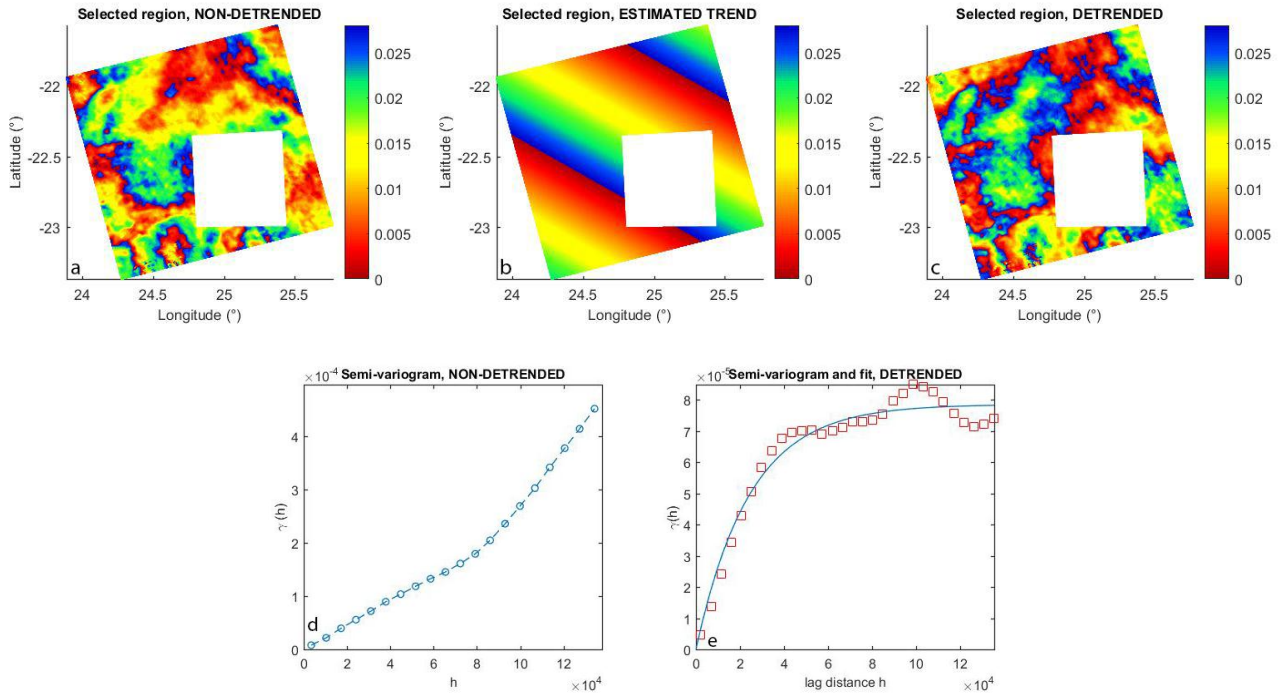

**Figure S2.** Estimation of the experimental semi-variogram on the de-trended dataset and fit with an exponential function with nugget. **(a)** Original wrapped dataset (the earthquake area is masked); **(b)** estimated linear ramp removed from the data; **(c)** de-trended wrapped dataset; **(d)** experimental semi-variogram calculated on the original dataset; **(e)** experimental semi-variogram (red squares) calculated on the de-trended dataset and exponential fit with nugget (blue line).

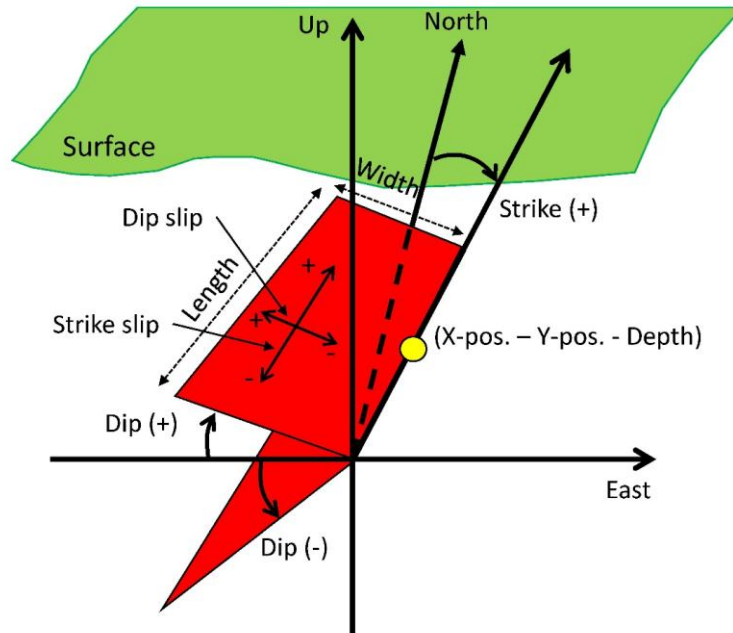

**Figure S3.** Sign convention adopted in the inversion procedure (modified from <http://comet.nerc.ac.uk/gbis/>).
